# Supplementary material
Source: ML conference proceedings conference paper supplement (https://openreview.net/forum?id=QeRAyn4igEA)
Supplement: supplementary_material [file attachment]

## 1    **A    Datasets**

2    We conduct our experiments on ImageNet, Stanford Dogs, Oxford 102 Flowers, and CIFAR-10/100.  
3    These datasets do not contain any personally identifiable information. They are publicly available for  
4    research use.

## 5    **B    Experimental Setup Details**

6    We specify all model architectures and the training details in Section B.1, Section B.2, and Section B.3.

### 7    **B.1    Large-scale classification: ImageNet**

8    We use ResNet-10, ResNet-18, and ResNet-26 on large-scale classification. The architectures are  
9    shown in Table 1. We use SGD optimizer with batch size 256. The initial learning rate, the momentum,  
10    and the weight decay are set to 0.1, 0.9, and  $10^{-4}$ , respectively. The training takes 100 epochs and the  
11    learning rate is scheduled to decay by a factor of 0.1 at epochs 30, 60, and 90. We augment the data  
12    via random crop and resize it to 224x224. We use "torchvision.transforms.RandomResizedCrop",  
13    which is implemented in Pytorch. Then the data is flipped horizontally with 50% probability. It takes  
14    3 days to train a model on a single GPU (Nvidia Tesla V100).

### 15    **B.2    Small-scale classification: CIFAR-10/100**

16    Both CIFAR10 and CIFAR100 contain 50,000 training images and 10,000 testing images. They are  
17    all  $32 \times 32$  colored images. We use ResNet-20 and ResNet-56 on small-scale image classification.  
18    The architectures are shown in Table 2. The training takes 200 epochs. We use SGD as the optimizer  
19    and the batch size is 128. The initial learning rate, the moment, and the weight decay are set to 0.1,  
20    0.9, and  $10^{-4}$ , respectively. The learning rate is scheduled to decay by a factor of 0.1 at epochs 100,  
21    150, and 180. In addition, the training images are augmented by random horizontal flips and random  
22    shifts by up to 4px to prevent overfitting. It takes about 1.5 hours to train a model on a single GPU  
23    (Nvidia Tesla V100).

### 24    **B.3    Fined-grained classification: Stanford Dogs and Oxford 102 Flowers**

25    We use ResNet-10, ResNet-18, and ResNet-26 on fine-grained classification. The architectures are  
26    shown in Table 1. We apply random crops, horizontal flips, and random gamma transform for data  
27    augmentation. We use SGD as the optimizer and the initial learning rate, the moment, and the weight  
28    decay are set to 0.1, 0.9, and  $10^{-4}$ , respectively. The training takes 200 epochs and the learning rate  
29    is scheduled to decay at epochs 100, 150, and 200 by a factor of 0.1. It takes about 1.5 hours to train  
30    a model on a single GPU (Nvidia Tesla V100).

## 31    **C    Details of the BlkSConv-based ResNet architectures**

32    We present more experiments and the architecture details of the BlkSConv-based ResNets that found  
33    by the proposed hyperparameter search algorithm (HSA) in Table 3, Table 4, Table 5, Table 6, Table 7,  
34    Table 8, Table 9, and Table 10. P\_ratio and MA\_ratio represent the parameter ratio and MAdds ratio  
35    compared to the standard model, respectively.

Table 1: ResNet architectures used for ImageNet, Stanford Dogs, and Oxford 102 Flowers. The PCA-based HSA is applied to conv3\_x, conv4\_x, conv5\_x layers.

| ResNet-10 (L=1), ResNet-18 (L=2), ResNet-26 (L=3) |                            |                                                                                 |              |                 |
|---------------------------------------------------|----------------------------|---------------------------------------------------------------------------------|--------------|-----------------|
| Layers Names                                      | Output Size                | ResNet                                                                          | Applying HSA | e.g.(ResNet-10) |
| conv1                                             | $112 \times 112 \times 64$ | $7 \times 7, 64$ , stride 2                                                     | No           |                 |
| max pool                                          | $56 \times 56 \times 64$   | $3 \times 3$ , stride 2                                                         |              |                 |
| conv2_x                                           | $56 \times 56 \times 64$   | $\begin{bmatrix} 3 \times 3, & 64 \\ 3 \times 3, & 64 \end{bmatrix} \times L$   | No           |                 |
| conv3_x                                           | $28 \times 28 \times 128$  | $\begin{bmatrix} 3 \times 3, & 128 \\ 3 \times 3, & 128 \end{bmatrix} \times L$ | Yes          | conv-s5t2       |
| conv4_x                                           | $14 \times 14 \times 256$  | $\begin{bmatrix} 3 \times 3, & 256 \\ 3 \times 3, & 256 \end{bmatrix} \times L$ | Yes          | conv-s5t2       |
| conv5_x                                           | $7 \times 7 \times 512$    | $\begin{bmatrix} 3 \times 3, & 512 \\ 3 \times 3, & 512 \end{bmatrix} \times L$ | Yes          | conv-s1t1       |
| average pool                                      | $1 \times 1 \times 512$    | $7 \times 7$                                                                    |              |                 |
| fully connected                                   | 1000                       | $512 \times 1000$ fc                                                            |              |                 |

Table 2: ResNet architectures used for CIFAR10/100. The PCA-based HSA is applied to conv4\_x layers.

| ResNet-20 (L=3), ResNet-56 (L=9) |                          |                                                                               |              |
|----------------------------------|--------------------------|-------------------------------------------------------------------------------|--------------|
| Layers Names                     | Output Size              | ResNet                                                                        | Applying HSA |
| conv1                            | $32 \times 32 \times 16$ | $3 \times 3, 16$                                                              | No           |
| conv2_x                          | $16 \times 16 \times 16$ | $\begin{bmatrix} 3 \times 3, & 16 \\ 3 \times 3, & 16 \end{bmatrix} \times L$ | No           |
| conv3_x                          | $8 \times 8 \times 16$   | $\begin{bmatrix} 3 \times 3, & 32 \\ 3 \times 3, & 32 \end{bmatrix} \times L$ | No           |
| conv4_x                          | $4 \times 4 \times 32$   | $\begin{bmatrix} 3 \times 3, & 64 \\ 3 \times 3, & 64 \end{bmatrix} \times L$ | Yes          |
| average pool                     | $1 \times 1 \times 64$   | $4 \times 4$                                                                  |              |
| fully connected                  | 10 (or 100)              | $64 \times 10$ (or 100) fc                                                    |              |

Table 3: BlkSConv-based ResNet-10 on ImageNet.

| ResNet-10 on ImageNet                |           |           |           |          |         |          |
|--------------------------------------|-----------|-----------|-----------|----------|---------|----------|
| $(\alpha_v, \alpha_c, \alpha_s, SS)$ | conv3_x   | conv4_x   | conv5_x   | Accuracy | P_ratio | MA_ratio |
| (0.50, 0.50, 0.50, max)              | s1t1-s4t1 | s1t1-s4t1 | s1t1-s4t1 | 62.736   | 0.3420  | 0.4596   |
| (0.50, 0.50, 0.75, max)              | s1t1-s4t1 | s1t1-s4t1 | s1t1-s4t1 | 62.736   | 0.3420  | 0.4596   |
| (0.50, 0.75, 0.50, max)              | s1t1-s4t1 | s1t1-s4t1 | s1t1-s4t1 | 62.736   | 0.3420  | 0.4596   |
| (0.50, 0.75, 0.75, max)              | s1t1-s6t1 | s1t1-s6t1 | s1t1-s6t1 | 62.79    | 0.4936  | 0.6139   |
| (0.75, 0.50, 0.50, max)              | conv-s4t1 | conv-s4t1 | conv-s4t1 | 63.646   | 0.6366  | 0.6418   |
| (0.75, 0.50, 0.75, max)              | conv-s4t1 | conv-s4t1 | conv-s4t1 | 63.646   | 0.6366  | 0.6418   |
| (0.75, 0.75, 0.50, max)              | conv-s4t1 | conv-s4t1 | conv-s4t1 | 63.646   | 0.6366  | 0.6418   |
| (0.75, 0.75, 0.75, max)              | conv-s6t1 | conv-s6t1 | conv-s6t1 | 63.622   | 0.7882  | 0.7960   |
| (0.50, 0.50, 0.50, min)              | s1t1-s1t1 | s1t1-s2t2 | s1t1-s1t2 | 61.958   | 0.0888  | 0.2560   |
| (0.50, 0.50, 0.75, min)              | s1t1-s1t1 | s1t1-s2t2 | s1t1-s1t2 | 61.958   | 0.0888  | 0.2560   |
| (0.50, 0.75, 0.50, min)              | s1t1-s1t1 | s1t1-s2t2 | s1t1-s1t2 | 61.958   | 0.0888  | 0.2560   |
| (0.50, 0.75, 0.75, min)              | s1t1-s1t1 | s1t1-s2t2 | s1t1-s1t2 | 61.958   | 0.0888  | 0.2560   |
| (0.75, 0.50, 0.50, min)              | conv-s3t1 | conv-s3t1 | conv-s1t1 | 63.398   | 0.4459  | 0.5144   |
| (0.75, 0.50, 0.75, min)              | conv-s3t1 | conv-s3t1 | conv-s1t1 | 63.398   | 0.4459  | 0.5144   |
| (0.75, 0.75, 0.50, min)              | conv-s5t2 | conv-s5t2 | conv-s1t1 | 63.464   | 0.4423  | 0.6314   |
| (0.75, 0.75, 0.75, min)              | conv-s5t2 | conv-s5t2 | conv-s1t1 | 63.464   | 0.4423  | 0.6314   |
| Standard                             | conv-conv | conv-conv | conv-conv | 63.686   | 4.64M   | 520M     |

Table 4: BlkSConv-based ResNet-18 on ImageNet.

| ResNet-18 on ImageNet                |                        |                        |                        |          |         |          |
|--------------------------------------|------------------------|------------------------|------------------------|----------|---------|----------|
| $(\alpha_v, \alpha_c, \alpha_s, SS)$ | conv3_x                | conv4_x                | conv5_x                | Accuracy | P_ratio | MA_ratio |
| (0.50, 0.50, 0.50, max)              | s1t1-s4t1<br>s4t1-s4t1 | s1t1-s4t1<br>s4t1-s4t1 | s1t1-s4t1<br>s4t1-s4t1 | 69.922   | 0.4065  | 0.4614   |
| (0.50, 0.50, 0.75, max)              | s1t1-s4t1<br>s4t1-s4t1 | s1t1-s4t1<br>s4t1-s4t1 | s1t1-s4t1<br>s4t1-s4t1 | 69.922   | 0.4065  | 0.4614   |
| (0.50, 0.75, 0.50, max)              | s1t1-s4t1<br>s4t1-s4t1 | s1t1-s4t1<br>s4t1-s4t1 | s1t1-s4t1<br>s4t1-s4t1 | 69.922   | 0.4065  | 0.4614   |
| (0.50, 0.75, 0.75, max)              | s1t1-s6t1<br>s6t1-s6t1 | s1t1-s6t1<br>s6t1-s6t1 | s1t1-s6t1<br>s6t1-s6t1 | 69.782   | 0.6014  | 0.6597   |
| (0.50, 0.50, 0.50, min)              | s1t1-s1t1<br>s2t2-s3t2 | s1t1-s1t1<br>s3t2-s3t2 | s1t1-s3t2<br>s1t1-s1t2 | 67.572   | 0.1264  | 0.2700   |
| (0.50, 0.50, 0.75, min)              | s1t1-s1t1<br>s2t2-s3t2 | s1t1-s1t1<br>s3t2-s3t2 | s1t1-s3t2<br>s1t1-s1t2 | 67.572   | 0.1264  | 0.2700   |
| (0.50, 0.75, 0.50, min)              | s1t1-s1t1<br>s2t2-s3t2 | s1t1-s1t1<br>s4t4-s4t4 | s1t1-s3t2<br>s1t1-s1t2 | 67.540   | 0.1246  | 0.2986   |
| (0.50, 0.75, 0.75, min)              | s1t1-s1t1<br>s2t2-s3t2 | s1t1-s1t1<br>s4t4-s4t4 | s1t1-s3t2<br>s1t1-s1t2 | 67.540   | 0.1246  | 0.2986   |
| Standard                             | conv-conv<br>conv-conv | conv-conv<br>conv-conv | conv-conv<br>conv-conv | 70.728   | 10.8M   | 1213.8M  |

Table 5: BlkSConv-based ResNet-26 on ImageNet.

| ResNet-26 on ImageNet                |                                     |                                     |                                     |          |         |          |
|--------------------------------------|-------------------------------------|-------------------------------------|-------------------------------------|----------|---------|----------|
| $(\alpha_v, \alpha_c, \alpha_s, SS)$ | conv3_x                             | conv4_x                             | conv5_x                             | Accuracy | P_ratio | MA_ratio |
| (0.50, 0.50, 0.50, max)              | s1t1-s4t1                           | s1t1-s4t1                           | s1t1-s4t1                           | 72.038   | 0.4241  | 0.4618   |
|                                      | s4t1-s4t1                           | s4t1-s4t1                           | s4t1-s4t1                           |          |         |          |
|                                      | s4t1-s4t1                           | s4t1-s4t1                           | s4t1-s4t1                           |          |         |          |
| (0.50, 0.50, 0.75, max)              | s1t1-s4t1                           | s1t1-s4t1                           | s1t1-s4t1                           | 72.038   | 0.4241  | 0.4618   |
|                                      | s4t1-s4t1                           | s4t1-s4t1                           | s4t1-s4t1                           |          |         |          |
|                                      | s4t1-s4t1                           | s4t1-s4t1                           | s4t1-s4t1                           |          |         |          |
| (0.50, 0.75, 0.50, max)              | s1t1-s4t1                           | s1t1-s4t1                           | s1t1-s4t1                           | 72.038   | 0.4241  | 0.4618   |
|                                      | s4t1-s4t1                           | s4t1-s4t1                           | s4t1-s4t1                           |          |         |          |
|                                      | s4t1-s4t1                           | s4t1-s4t1                           | s4t1-s4t1                           |          |         |          |
| (0.50, 0.75, 0.75, max)              | s1t1-s6t1                           | s1t1-s6t1                           | s1t1-s6t1                           | 72.326   | 0.6308  | 0.6722   |
|                                      | s6t1-s6t1                           | s6t1-s6t1                           | s6t1-s6t1                           |          |         |          |
|                                      | s6t1-s6t1                           | s6t1-s6t1                           | s6t1-s6t1                           |          |         |          |
| (0.50, 0.50, 0.50, min)              | s1t1-s4t1                           | s1t1-s1t1                           | s1t1-s3t2                           | 69.970   | 0.1250  | 0.2668   |
|                                      | s1t1-s3t2                           | s1t1-s3t2                           | s1t1-s1t1                           |          |         |          |
|                                      | s3t2-s3t2                           | s3t2-s3t2                           | s3t4-s1t2                           |          |         |          |
| (0.50, 0.50, 0.75, min)              | s1t1-s4t1                           | s1t1-s1t1                           | s1t1-s3t2                           | 69.970   | 0.1250  | 0.2668   |
|                                      | s1t1-s3t2                           | s1t1-s3t2                           | s1t1-s1t1                           |          |         |          |
|                                      | s3t2-s3t2                           | s3t2-s3t2                           | s3t4-s1t2                           |          |         |          |
| (0.50, 0.75, 0.50, min)              | s1t1-s4t1                           | s1t1-s1t1                           | s1t1-s5t4                           | 69.922   | 0.1243  | 0.2910   |
|                                      | s1t1-s3t2                           | s1t1-s4t4                           | s1t1-s1t1                           |          |         |          |
|                                      | s3t2-s3t2                           | s3t2-s3t2                           | s3t4-s1t2                           |          |         |          |
| (0.50, 0.75, 0.75, min)              | s1t1-s4t1                           | s1t1-s1t1                           | s1t1-s5t4                           | 69.922   | 0.1243  | 0.2910   |
|                                      | s1t1-s3t2                           | s1t1-s4t4                           | s1t1-s1t1                           |          |         |          |
|                                      | s3t2-s3t2                           | s3t2-s3t2                           | s3t4-s1t2                           |          |         |          |
| Standard                             | conv-conv<br>conv-conv<br>conv-conv | conv-conv<br>conv-conv<br>conv-conv | conv-conv<br>conv-conv<br>conv-conv | 72.604   | 17.03M  | 1907.4M  |

Table 6: BlkSConv-based ResNet-20 on CIFAR10.

| ResNet-20 on CIFAR 10                |           |           |           |          |         |          |
|--------------------------------------|-----------|-----------|-----------|----------|---------|----------|
| $(\alpha_v, \alpha_c, \alpha_s, SS)$ | conv4_1   | conv4_2   | conv4_3   | Accuracy | P_ratio | MA_ratio |
| (0.50, 0.50, 0.50, max)              | s1t1-s3t1 | s3t1-s3t1 | s3t1-s3t1 | 91.652   | 0.3586  | 0.3889   |
| (0.50, 0.50, 0.75, max)              | s1t1-s3t1 | s3t1-s3t1 | s3t1-s3t1 | 91.652   | 0.3586  | 0.3889   |
| (0.50, 0.75, 0.50, max)              | s1t1-s5t2 | s5t2-s5t2 | s5t2-s5t2 | 91.886   | 0.4075  | 0.6903   |
| (0.50, 0.75, 0.75, max)              | s1t1-s5t1 | s5t1-s5t1 | s5t1-s5t1 | 91.836   | 0.5890  | 0.6193   |
| (0.50, 0.50, 0.50, min)              | s1t1-s3t1 | s3t1-s2t1 | s2t1-s1t1 | 91.574   | 0.2664  | 0.2967   |
| (0.50, 0.50, 0.75, min)              | s1t1-s3t1 | s3t1-s2t1 | s2t1-s1t1 | 91.574   | 0.2644  | 0.2967   |
| (0.50, 0.75, 0.50, min)              | s1t1-s4t2 | s4t2-s2t1 | s2t1-s1t1 | 91.612   | 0.2544  | 0.3655   |
| (0.50, 0.75, 0.75, min)              | s1t1-s4t2 | s4t2-s2t1 | s2t1-s1t1 | 91.612   | 0.2544  | 0.3655   |
| Standard                             | conv-conv | conv-conv | conv-conv | 92.006   | 202752  | 12.97M   |

Table 7: BlkSConv-based ResNet-20 on CIFAR100.

| ResNet-20 on CIFAR 100               |           |           |           |          |         |          |
|--------------------------------------|-----------|-----------|-----------|----------|---------|----------|
| $(\alpha_v, \alpha_c, \alpha_s, SS)$ | conv4_1   | conv4_2   | conv4_3   | Accuracy | P_ratio | MA_ratio |
| (0.50, 0.50, 0.50, max)              | s1t1-s3t1 | s3t1-s3t1 | s3t1-s3t1 | 67.078   | 0.3586  | 0.3889   |
| (0.50, 0.50, 0.75, max)              | s1t1-s3t1 | s3t1-s3t1 | s3t1-s3t1 | 67.078   | 0.3586  | 0.3889   |
| (0.50, 0.75, 0.50, max)              | s1t1-s5t2 | s5t2-s5t2 | s5t2-s5t2 | 67.212   | 0.4075  | 0.6903   |
| (0.50, 0.75, 0.75, max)              | s1t1-s5t1 | s5t1-s5t1 | s5t1-s5t1 | 67.552   | 0.5890  | 0.6193   |
| (0.50, 0.50, 0.50, min)              | s1t1-s2t1 | s2t1-s2t1 | s2t1-s1t1 | 66.554   | 0.2203  | 0.2506   |
| (0.50, 0.50, 0.75, min)              | s1t1-s2t1 | s2t1-s2t1 | s2t1-s1t1 | 66.554   | 0.2203  | 0.2506   |
| (0.50, 0.75, 0.50, min)              | s1t1-s2t1 | s2t1-s2t1 | s2t1-s1t1 | 66.554   | 0.2203  | 0.2506   |
| (0.50, 0.75, 0.75, min)              | s1t1-s2t1 | s2t1-s2t1 | s2t1-s1t1 | 66.554   | 0.2203  | 0.2506   |
| Standard                             | conv-conv | conv-conv | conv-conv | 67.994   | 202752  | 12.97M   |

Table 8: BlkSConv-based ResNet-56 on CIFAR10.

| ResNet-56 on CIFAR 10                |                                     |                                     |                                     |          |         |          |
|--------------------------------------|-------------------------------------|-------------------------------------|-------------------------------------|----------|---------|----------|
| $(\alpha_v, \alpha_c, \alpha_s, SS)$ | conv4_1<br>conv4_2<br>conv4_3       | conv4_4<br>conv4_5<br>conv4_6       | conv4_7<br>conv4_8<br>conv4_9       | Accuracy | P_ratio | MA_ratio |
| (0.50, 0.50, 0.50, max)              | s1t1-s3t1<br>s3t1-s3t1<br>s3t1-s3t1 | s3t1-s3t1<br>s3t1-s3t1<br>s3t1-s3t1 | s3t1-s3t1<br>s3t1-s3t1<br>s3t1-s3t1 | 93.372   | 0.3734  | 0.3829   |
| (0.50, 0.50, 0.75, max)              | s1t1-s3t1<br>s3t1-s3t1<br>s3t1-s3t1 | s3t1-s3t1<br>s3t1-s3t1<br>s3t1-s3t1 | s3t1-s3t1<br>s3t1-s3t1<br>s3t1-s3t1 | 93.372   | 0.3734  | 0.3829   |
| (0.50, 0.75, 0.50, max)              | s1t1-s5t2<br>s5t2-s5t2<br>s5t2-s5t2 | s5t2-s5t2<br>s5t2-s5t2<br>s5t2-s5t2 | s5t2-s5t2<br>s5t2-s5t2<br>s5t2-s5t2 | 93.332   | 0.4257  | 0.7051   |
| (0.50, 0.75, 0.75, max)              | s1t1-s5t1<br>s5t1-s5t1<br>s5t2-s5t2 | s5t2-s5t2<br>s5t2-s5t2<br>s5t2-s5t2 | s5t2-s5t2<br>s5t2-s5t2<br>s5t2-s5t2 | 93.338   | 0.6196  | 0.6292   |
| (0.50, 0.50, 0.50, min)              | s1t1-s2t1<br>s2t1-s2t1<br>s2t1-s2t1 | s2t1-s2t1<br>s2t1-s2t1<br>s2t1-s2t1 | s2t1-s2t1<br>s2t1-s2t1<br>s1t1-s1t2 | 93.324   | 0.2335  | 0.2462   |
| (0.50, 0.50, 0.75, min)              | s1t1-s2t1<br>s2t1-s2t1<br>s2t1-s2t1 | s2t1-s2t1<br>s2t1-s2t1<br>s2t1-s2t1 | s2t1-s2t1<br>s2t1-s2t1<br>s1t1-s1t2 | 93.324   | 0.2335  | 0.2462   |
| (0.50, 0.75, 0.50, min)              | s1t1-s2t1<br>s2t1-s2t1<br>s2t1-s2t1 | s2t1-s2t1<br>s2t1-s2t1<br>s2t1-s2t1 | s2t1-s2t1<br>s2t1-s2t1<br>s1t1-s1t2 | 93.324   | 0.2335  | 0.2462   |
| (0.50, 0.75, 0.75, min)              | s1t1-s2t1<br>s2t1-s2t1<br>s2t1-s2t1 | s2t1-s2t1<br>s2t1-s2t1<br>s2t1-s2t1 | s2t1-s2t1<br>s2t1-s2t1<br>s1t1-s1t2 | 93.324   | 0.2335  | 0.2462   |
| Standard                             | conv-conv<br>conv-conv<br>conv-conv | conv-conv<br>conv-conv<br>conv-conv | conv-conv<br>conv-conv<br>conv-conv | 93.218   | 645120  | 41.28M   |

Table 9: BlkSConv-based ResNet-56 on CIFAR100.

| ResNet-56 on CIFAR 100               |                                     |                                     |                                     |          |         |          |
|--------------------------------------|-------------------------------------|-------------------------------------|-------------------------------------|----------|---------|----------|
| $(\alpha_v, \alpha_c, \alpha_s, SS)$ | conv4_1<br>conv4_2<br>conv4_3       | conv4_4<br>conv4_5<br>conv4_6       | conv4_7<br>conv4_8<br>conv4_9       | Accuracy | P_ratio | MA_ratio |
| $(0.50, 0.50, 0.50, \max)$           | s1t1-s3t1<br>s3t1-s3t1<br>s3t1-s3t1 | s3t1-s3t1<br>s3t1-s3t1<br>s3t1-s3t1 | s3t1-s3t1<br>s3t1-s3t1<br>s3t1-s3t1 | 70.636   | 0.3734  | 0.3829   |
| $(0.50, 0.50, 0.75, \max)$           | s1t1-s3t1<br>s3t1-s3t1<br>s3t1-s3t1 | s3t1-s3t1<br>s3t1-s3t1<br>s3t1-s3t1 | s3t1-s3t1<br>s3t1-s3t1<br>s3t1-s3t1 | 70.636   | 0.3734  | 0.3829   |
| $(0.50, 0.75, 0.50, \max)$           | s1t1-s5t2<br>s5t2-s5t2<br>s5t2-s5t2 | s5t2-s5t2<br>s5t2-s5t2<br>s5t2-s5t2 | s5t2-s5t2<br>s5t2-s5t2<br>s5t2-s5t2 | 70.790   | 0.4257  | 0.7051   |
| $(0.50, 0.75, 0.75, \max)$           | s1t1-s5t1<br>s5t1-s5t1<br>s5t1-s5t1 | s5t1-s5t1<br>s5t1-s5t1<br>s5t1-s5t1 | s5t1-s5t1<br>s5t1-s5t1<br>s5t1-s5t1 | 70.668   | 0.6196  | 0.6292   |
| $(0.50, 0.50, 0.50, \min)$           | s1t1-s2t1<br>s2t1-s2t1<br>s2t1-s2t1 | s2t1-s2t1<br>s2t1-s2t1<br>s2t1-s2t1 | s2t1-s2t1<br>s2t1-s2t2<br>s2t2-s1t2 | 69.994   | 0.2316  | 0.2570   |
| $(0.50, 0.50, 0.75, \min)$           | s1t1-s2t1<br>s2t1-s2t1<br>s2t1-s2t1 | s2t1-s2t1<br>s2t1-s2t1<br>s2t1-s2t1 | s2t1-s2t1<br>s2t1-s2t2<br>s2t2-s1t2 | 69.994   | 0.2316  | 0.2570   |
| $(0.50, 0.75, 0.50, \min)$           | s1t1-s2t1<br>s2t1-s2t1<br>s2t1-s2t1 | s2t1-s2t1<br>s2t1-s2t1<br>s2t1-s2t1 | s2t1-s2t1<br>s2t1-s2t2<br>s2t2-s1t2 | 69.994   | 0.2316  | 0.2570   |
| $(0.50, 0.75, 0.75, \min)$           | s1t1-s2t1<br>s2t1-s2t1<br>s2t1-s2t1 | s2t1-s2t1<br>s2t1-s2t1<br>s2t1-s2t1 | s2t1-s2t1<br>s2t1-s2t2<br>s2t2-s1t2 | 69.994   | 0.2316  | 0.2570   |
| Standard                             | conv-conv<br>conv-conv<br>conv-conv | conv-conv<br>conv-conv<br>conv-conv | conv-conv<br>conv-conv<br>conv-conv | 70.998   | 645120  | 41.28M   |

Table 10: BlkSConv-based ResNet-18 on Stanford Dogs.

| ResNet-18 on Stanford Dogs           |                        |                        |                        |          |         |          |
|--------------------------------------|------------------------|------------------------|------------------------|----------|---------|----------|
| $(\alpha_v, \alpha_c, \alpha_s, SS)$ | conv3_x                | conv4_x                | conv5_x                | Accuracy | P_ratio | MA_ratio |
| $(0.5, 0.5, 0.5, \max)$              | conv-s4t1<br>s4t1-s4t1 | conv-s4t1<br>s4t1-s4t1 | conv-s4t1<br>s4t1-s4t1 | 53.005   | 0.5327  | 0.5394   |
| $(0.5, 0.75, 0.75, \max)$            | conv-s6t1<br>s6t1-s6t1 | conv-s6t1<br>s6t1-s6t1 | conv-s6t1<br>s6t1-s6t1 | 53.359   | 0.7277  | 0.7377   |
| $(0.5, 0.5, 0.5, \min)$              | conv-s3t1<br>s2t1-s3t2 | conv-s2t1<br>s2t1-s2t1 | conv-s3t1<br>s3t2-s3t4 | 53.159   | 0.3273  | 0.4006   |
| $(0.5, 0.75, 0.75, \min)$            | conv-s4t2<br>s2t1-s3t2 | conv-s2t1<br>s2t1-s2t1 | conv-s5t2<br>s5t4-s3t4 | 53.615   | 0.3171  | 0.4611   |
| Standard                             | conv-conv<br>conv-conv | conv-conv<br>conv-conv | conv-conv<br>conv-conv | 52.436   | 10.8M   | 1213.8M  |
